# Supplementary material for: Porous, catalytically active palladium nanostructures by tuning nanoparticle interactions in an organic medium
Source: Royal Society of Chemistry journal article supplement (doi:10.1039/c0nr00640h), 2010-12-07
Supplement: c0nr00640h.pdf [file c0nr00640h.pdf]

### Supplementary Information

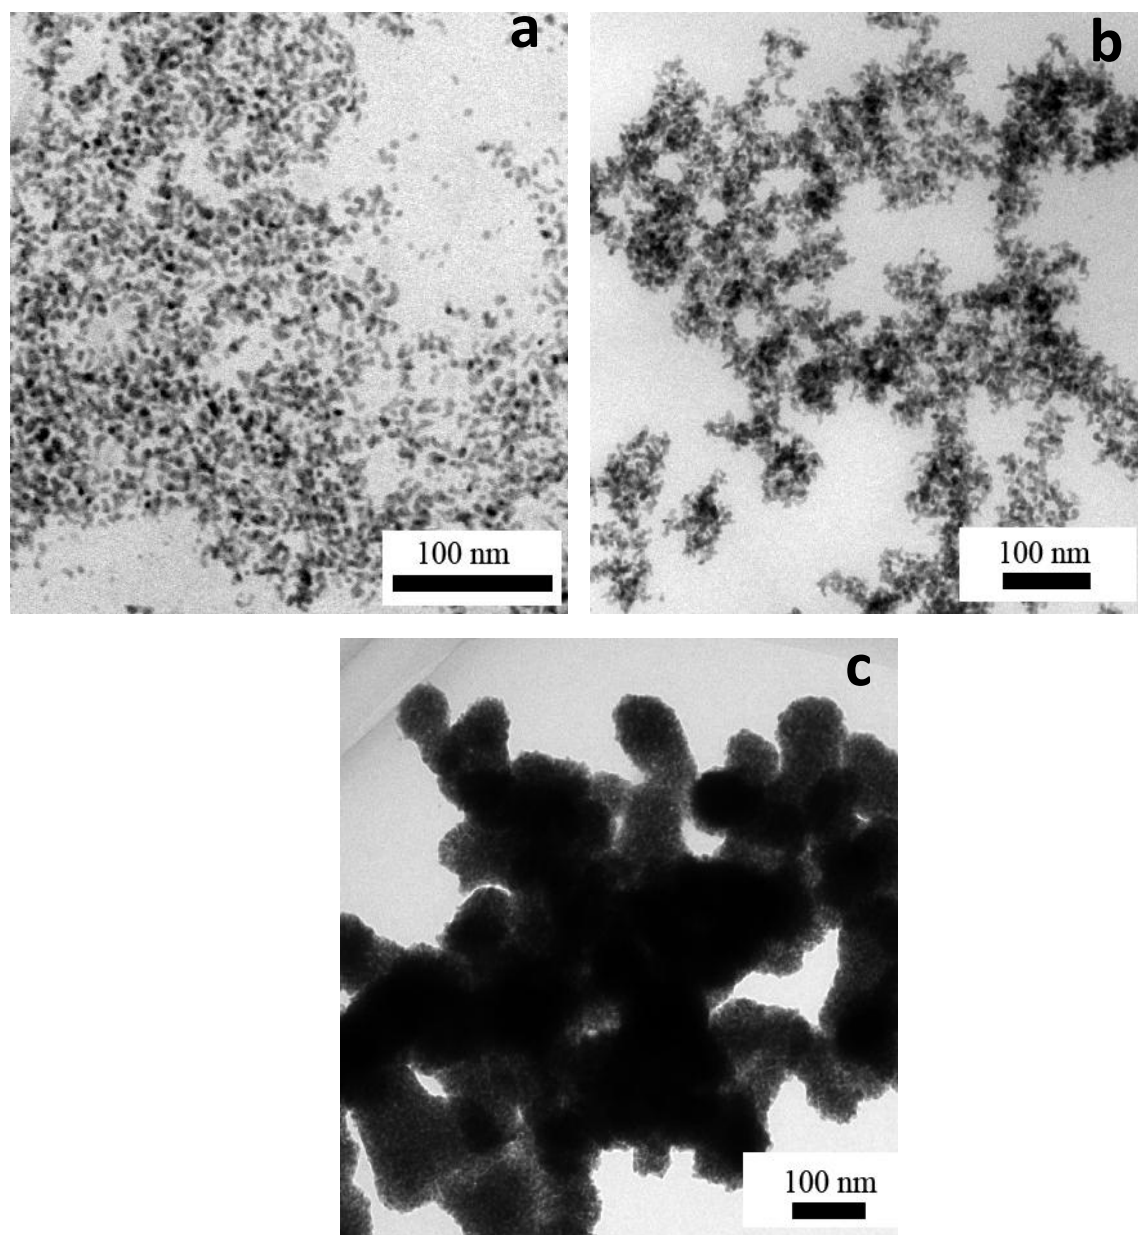

The figure shows the Pd nanostructures prepared at dielectric constants of the binary mixture of the reaction solution are (a)  $\epsilon_m = 7$ , (b)  $\epsilon_m = 10$ , (c)  $\epsilon_m = 24$ .
